# Supplementary material
Source: PubMed Central journal article supplement (PMC5815566)
Supplement: brain-2017-01283-file009_awx338.pdf [file brain-2017-01283-file009_awx338.pdf]

**Supplementary Table I. Mean Amplitudes for the Low Visual Feedback, High Visual Feedback, and High-Low Change Scores  
\*Indicates Significant Change Between Visual Feedback Conditions (p<0.05).**

| Outcome Measure                | Low Amplitude |              | High Amplitude |              | High – Low Change Score |               |
|--------------------------------|---------------|--------------|----------------|--------------|-------------------------|---------------|
|                                | ET            | Control      | ET             | Control      | ET                      | Control       |
| Force Amplitude (%MVC)         | 12.60 (4.42)  | 12.39 (2.79) | 13.75 (2.91)   | 14.45 (1.77) | 1.15 (3.26)             | 2.06 (2.21)*  |
| Force Unfiltered Error (N)     | 2.18 (1.45)   | 1.93 (1.25)  | 1.35 (1.40)    | 0.56 (0.96)  | -0.83 (0.88)*           | -1.36 (1.11)* |
| Force 0-3Hz Error (N)          | 2.12 (1.48)   | 1.92 (1.26)  | 1.19 (1.41)    | 0.54 (0.96)  | -0.93 (0.88)*           | -1.38 (1.12)* |
| Force Tremor (N <sup>2</sup> ) | 9.13 (17.52)  | 0.51 (0.87)  | 18.04 (35.45)  | 0.57 (0.82)  | 8.91 (18.91)*           | 0.06 (0.32)   |
